# Supplementary figures and images for: Synthesizing UNIX shell scripts using derivational analogy: an empirical assessment
Source: eLife journal article supplement (doi:10.7554/elife.12318), 1991-07-14

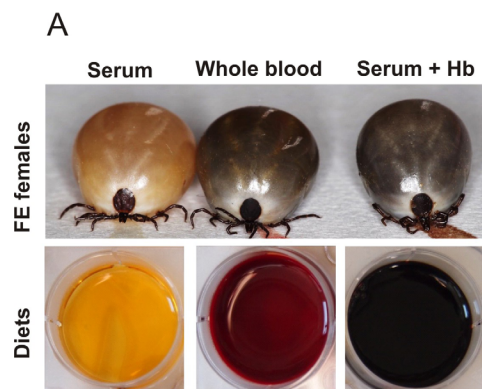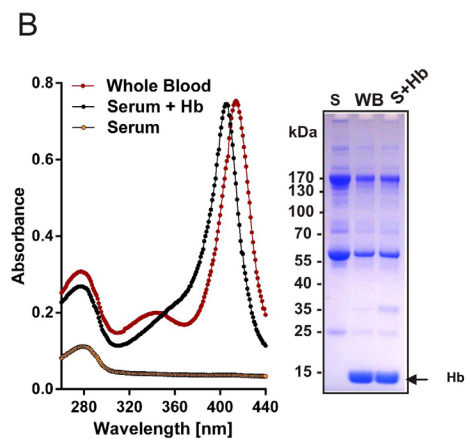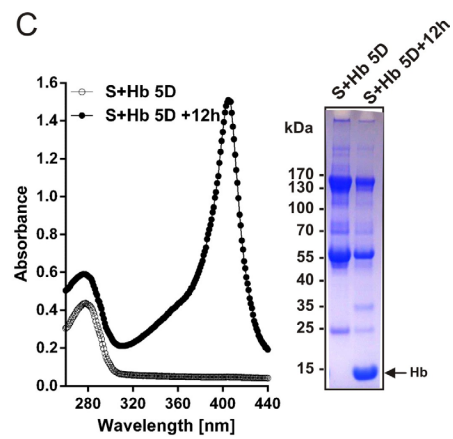

Supplement: supp [file elife-12318-supp-v1.zip]

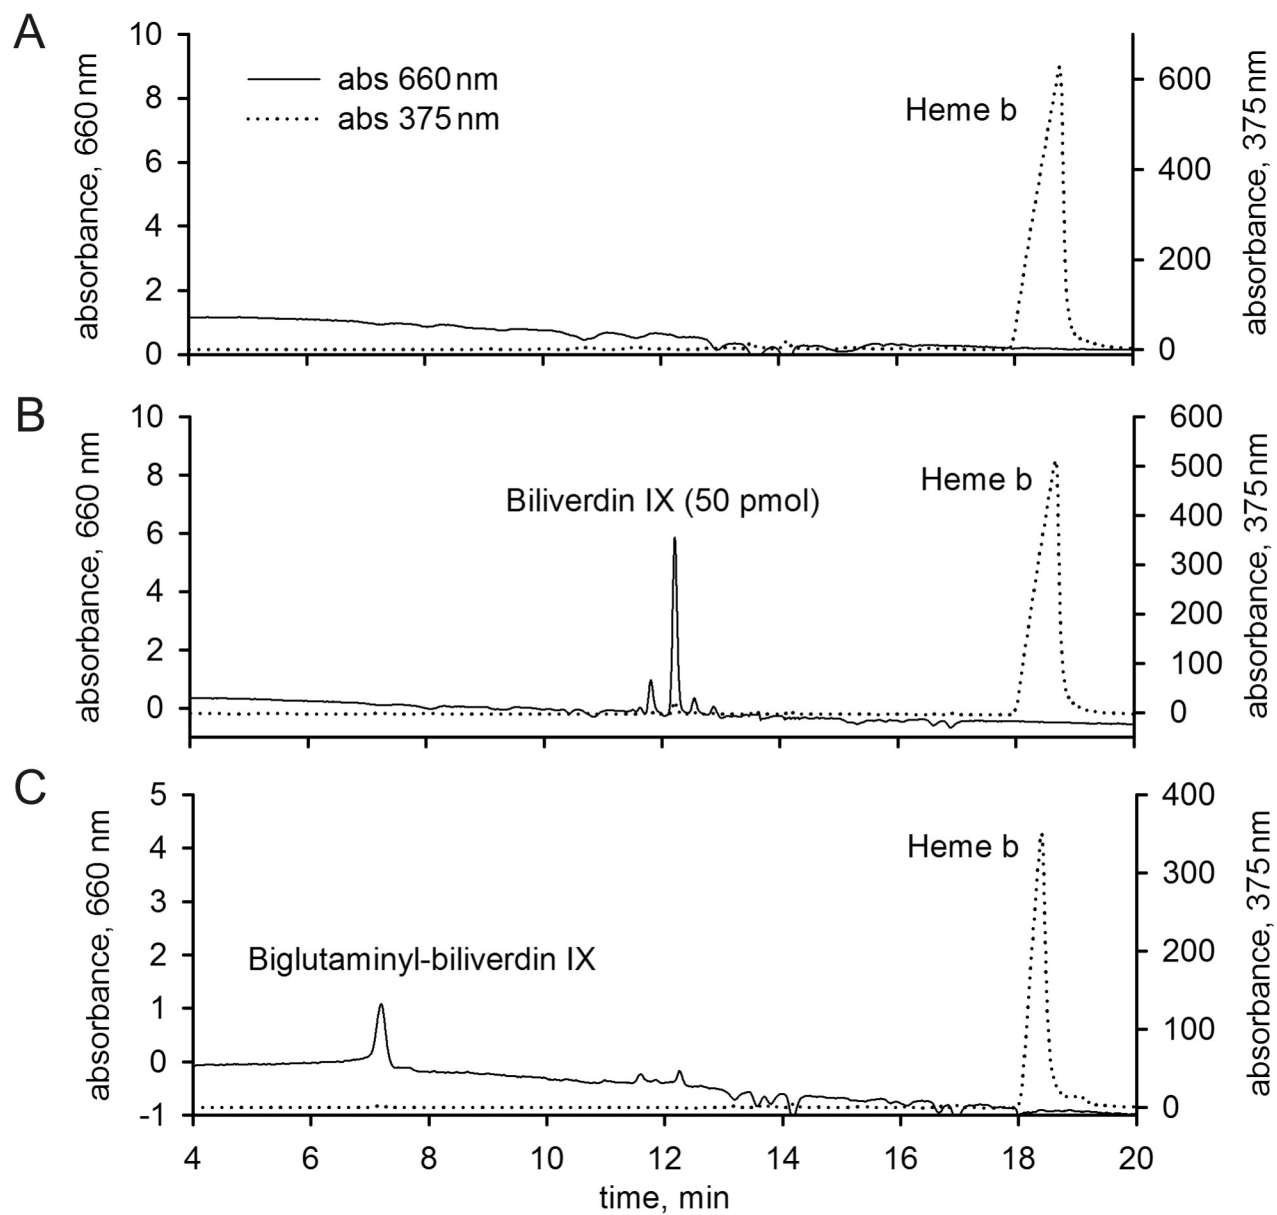

Supplement: supp [file elife-12318-supp-v1.zip]

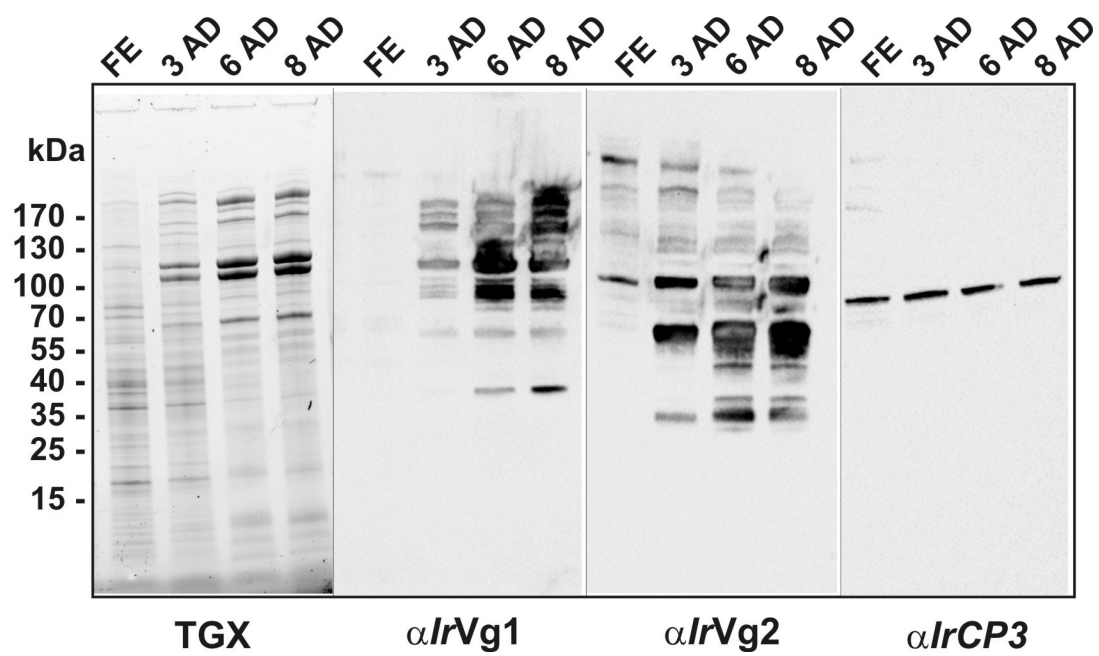

Supplement: supp [file elife-12318-supp-v1.zip]

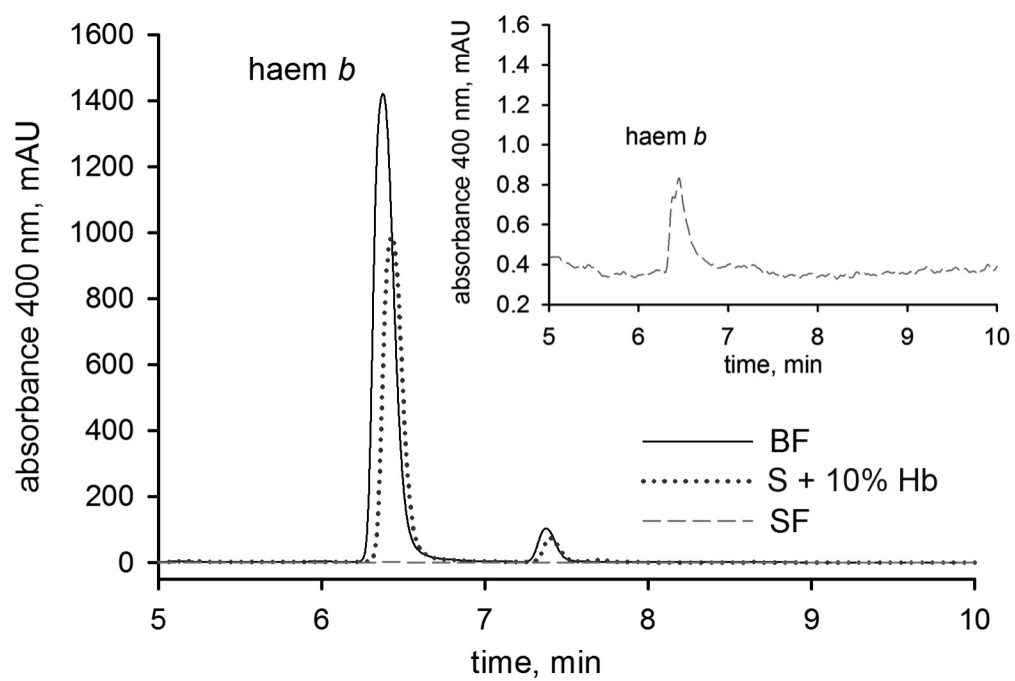

Supplement: supp [file elife-12318-supp-v1.zip]

A

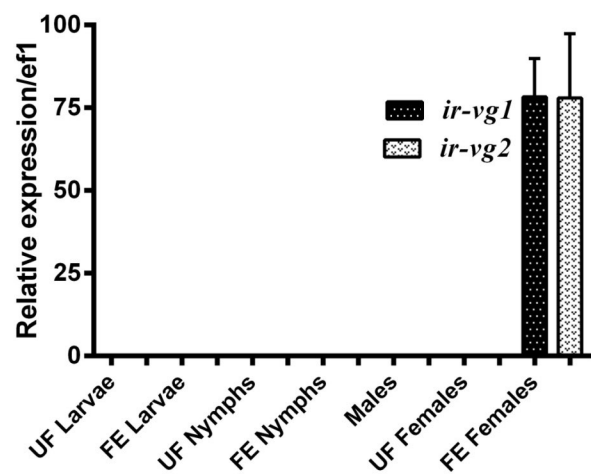

B

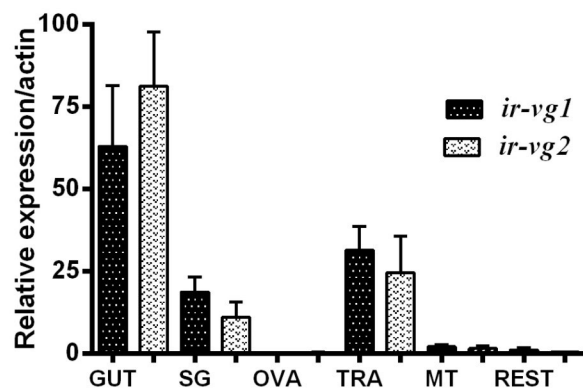

C

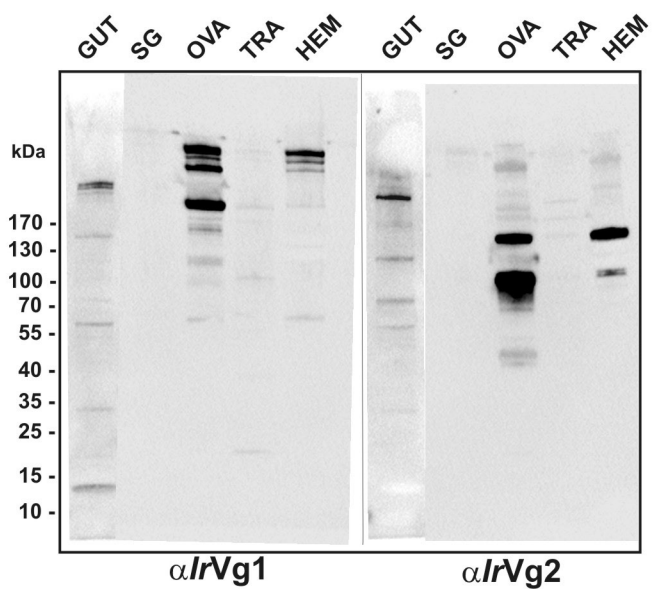

Supplement: supp [file elife-12318-supp-v1.zip]

A

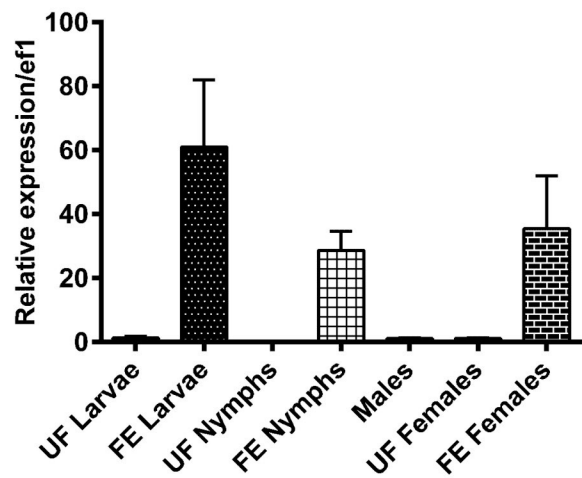

B

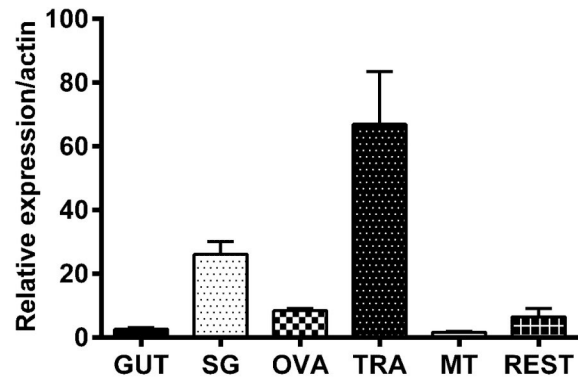

C

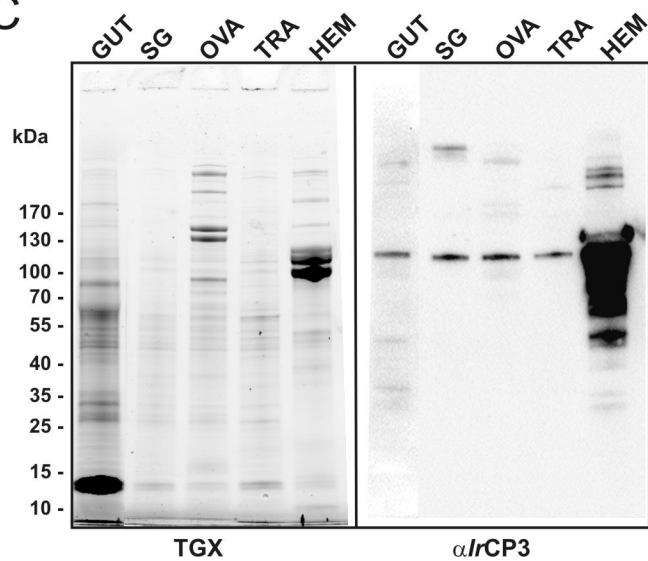

Supplement: supp [file elife-12318-supp-v1.zip]

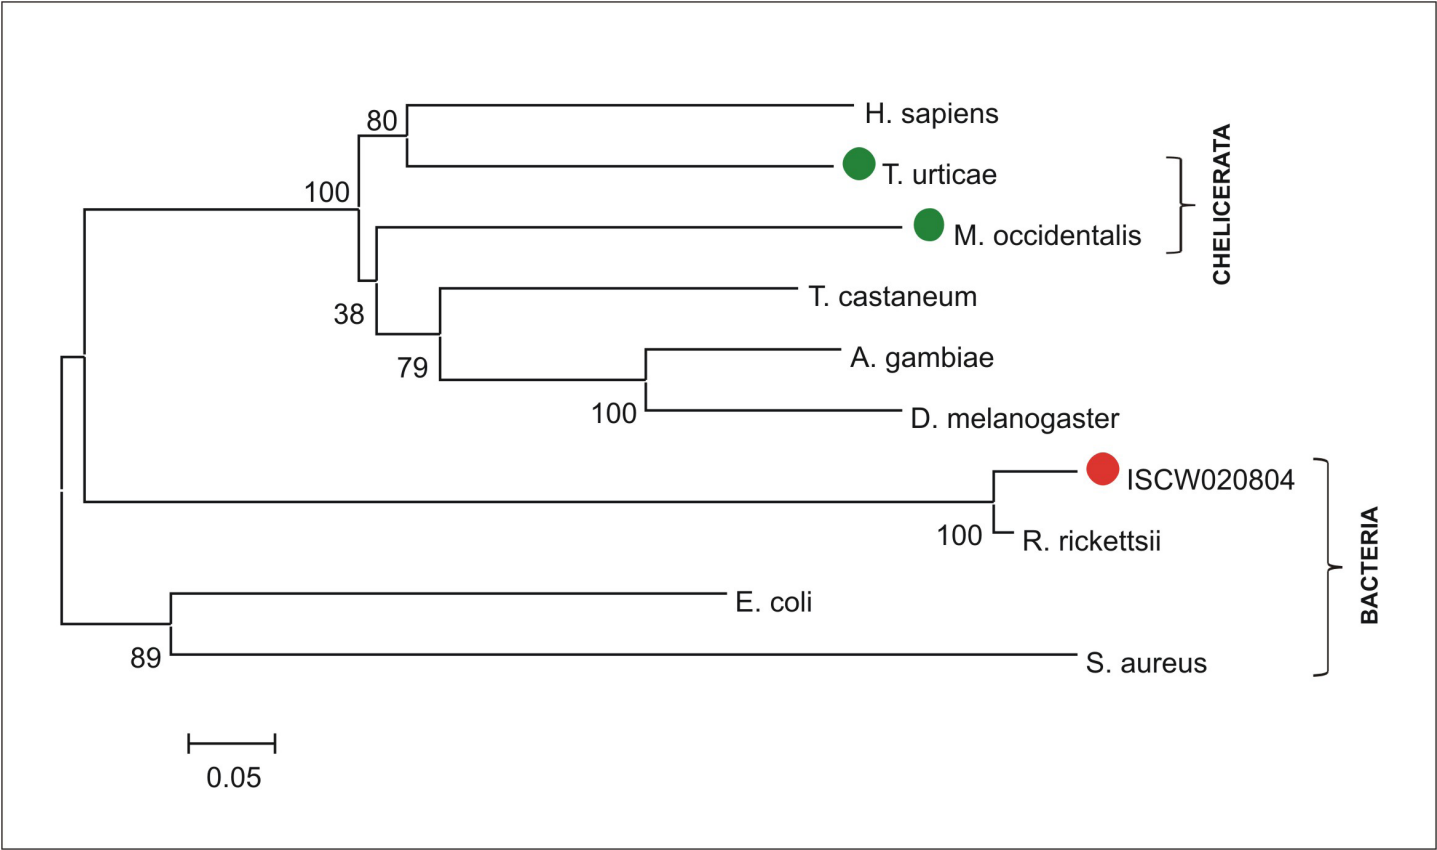

Supplement: supp [file elife-12318-supp-v1.zip]

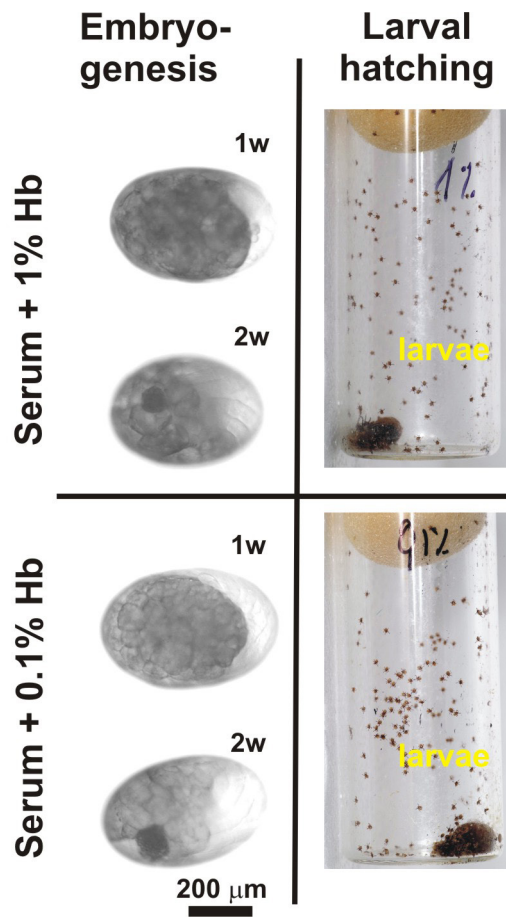

Supplement: supp [file elife-12318-supp-v1.zip]

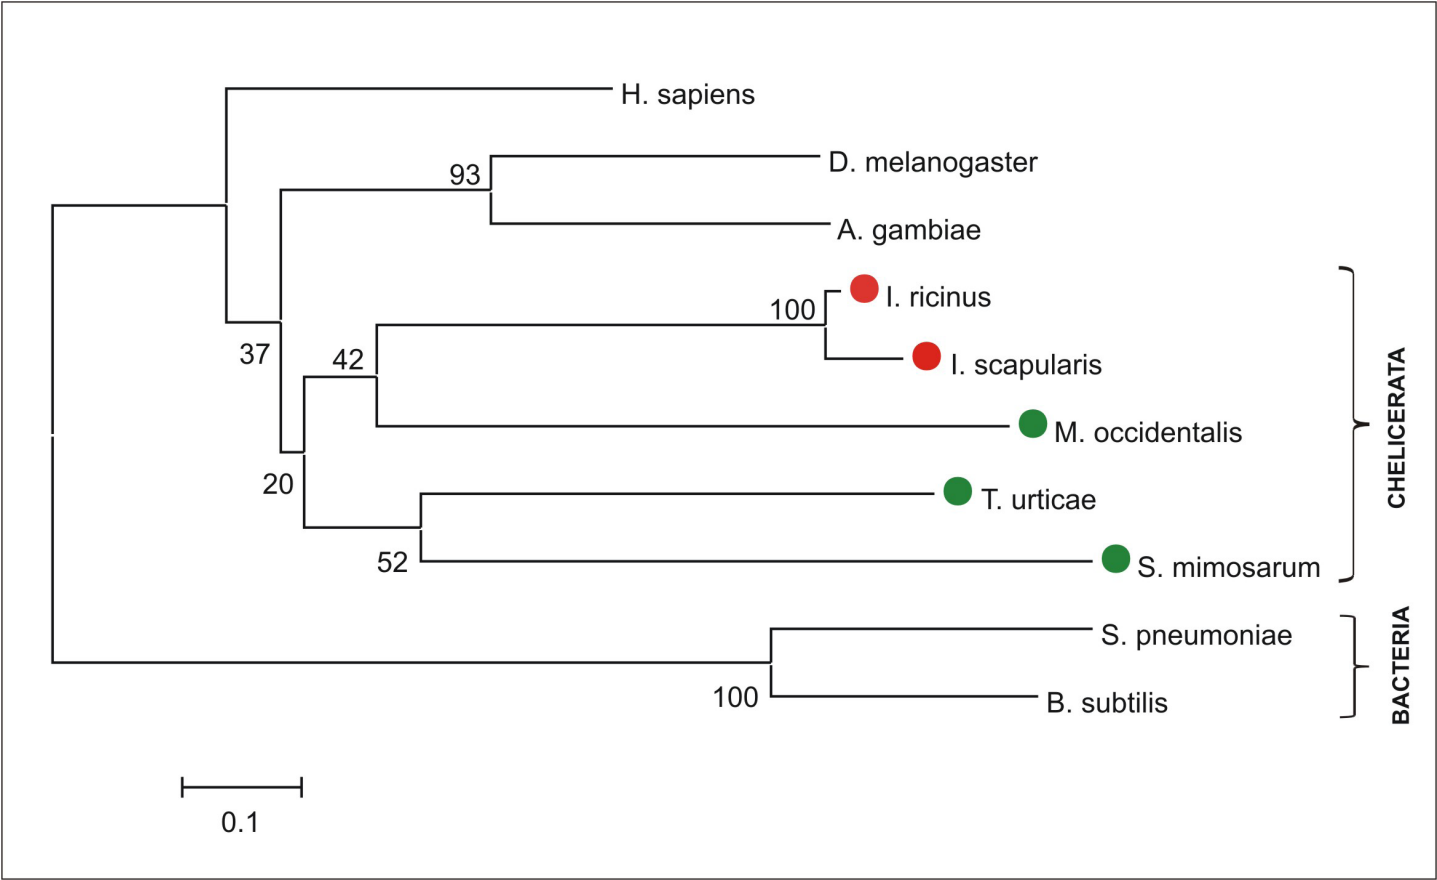

Supplement: supp [file elife-12318-supp-v1.zip]

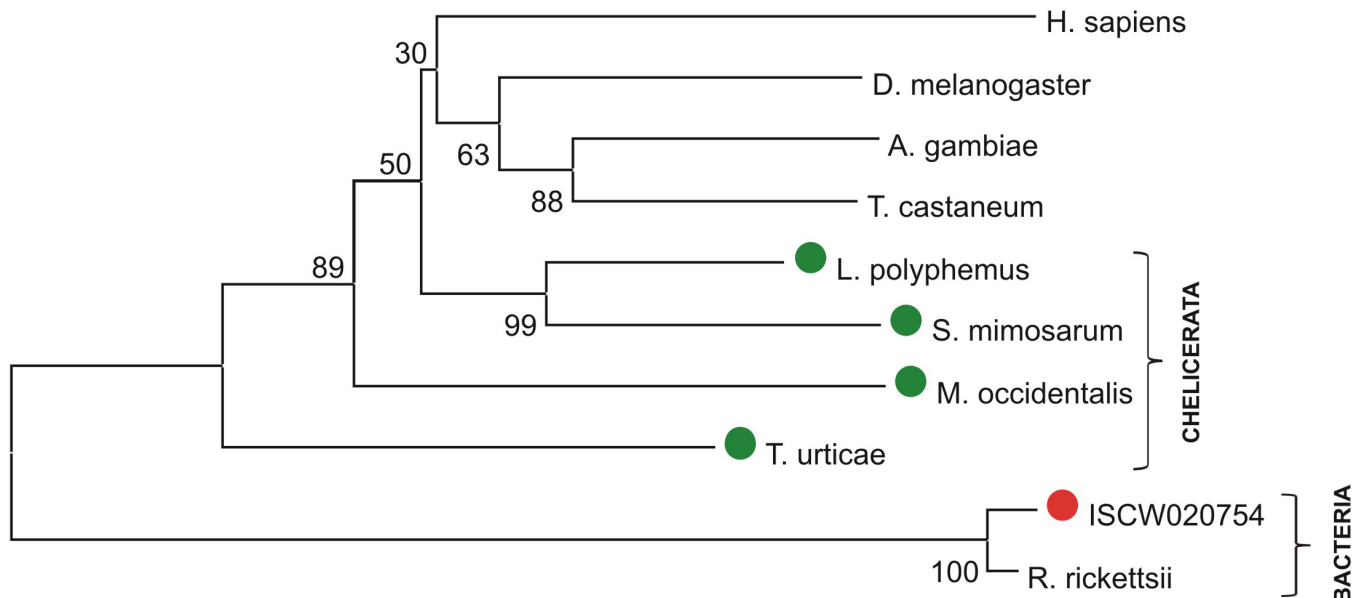

Supplement: supp [file elife-12318-supp-v1.zip]

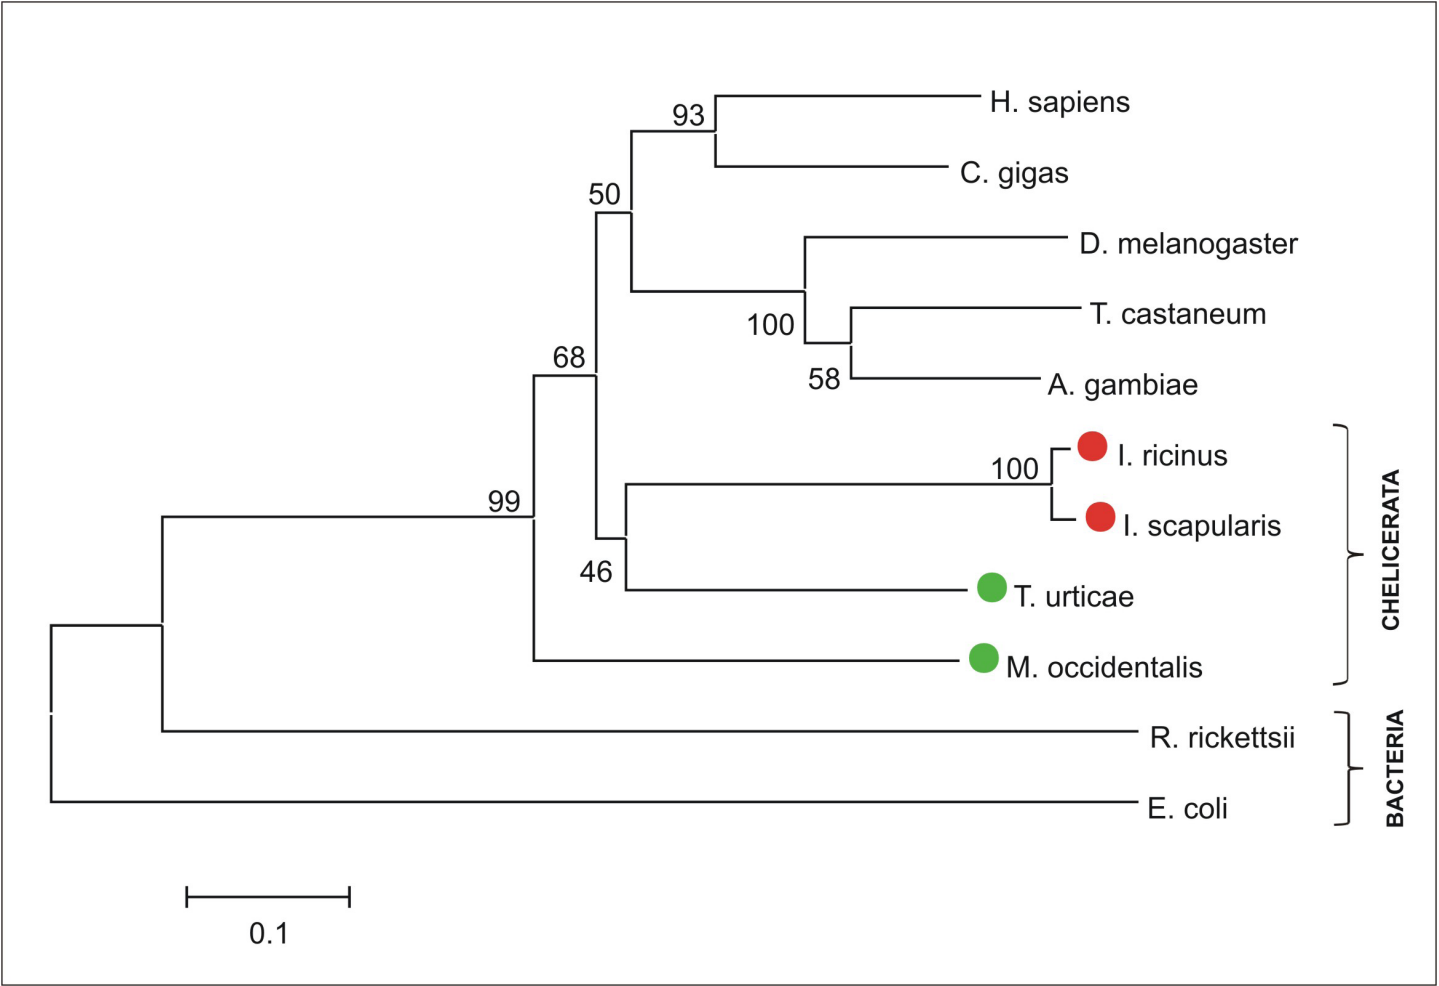

Supplement: supp [file elife-12318-supp-v1.zip]

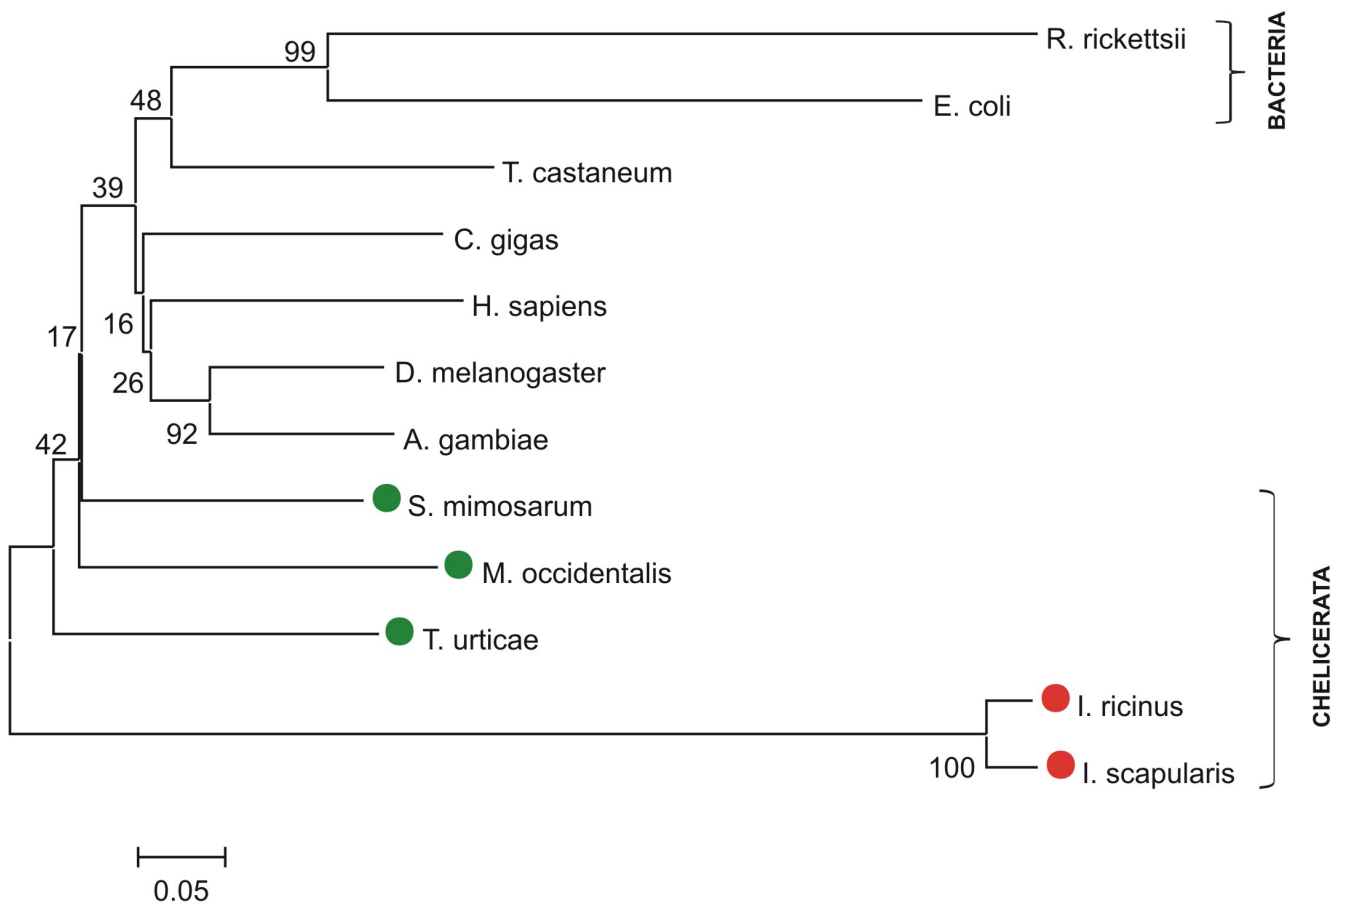

Supplement: supp [file elife-12318-supp-v1.zip]

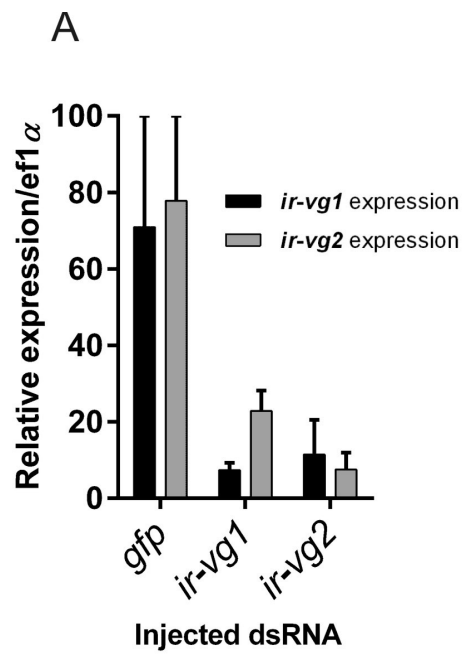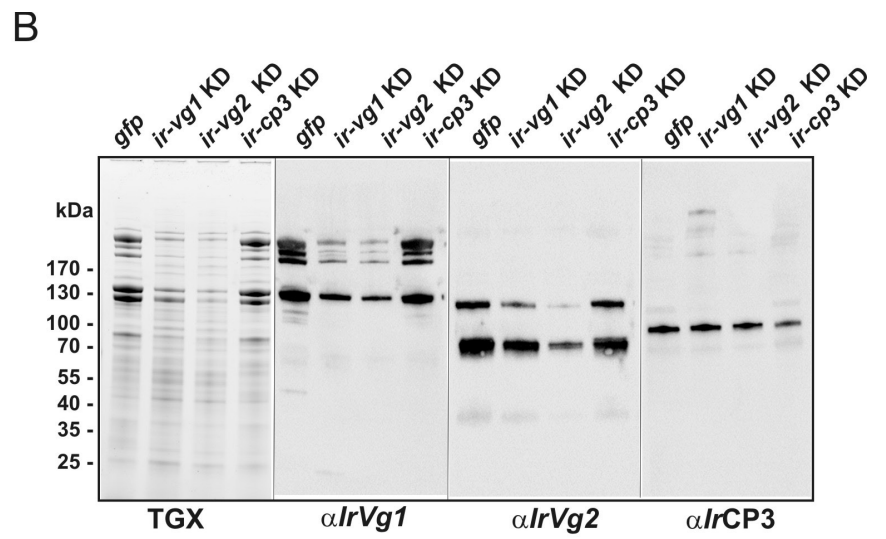

Supplement: supp [file elife-12318-supp-v1.zip]

A

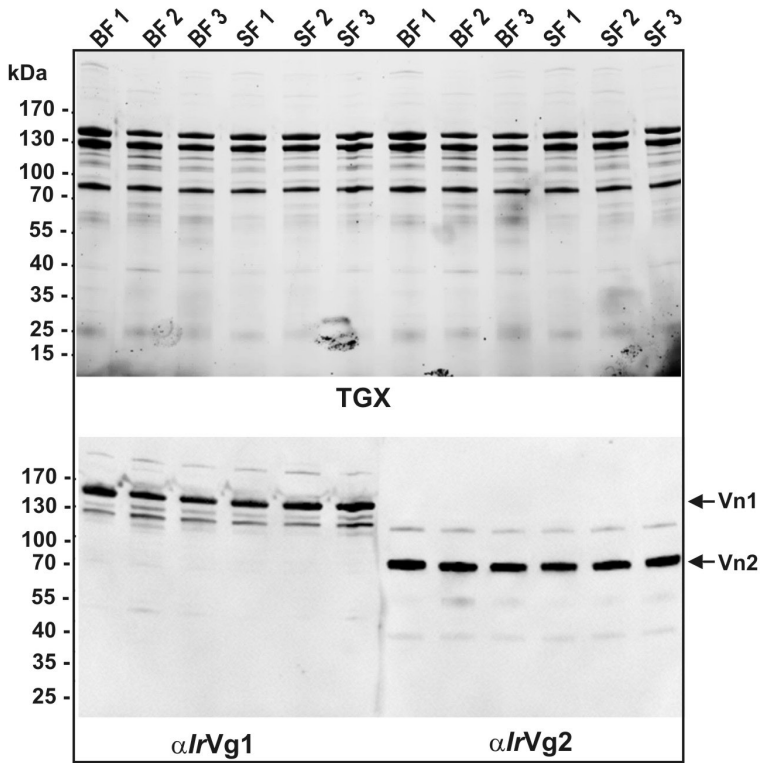

B

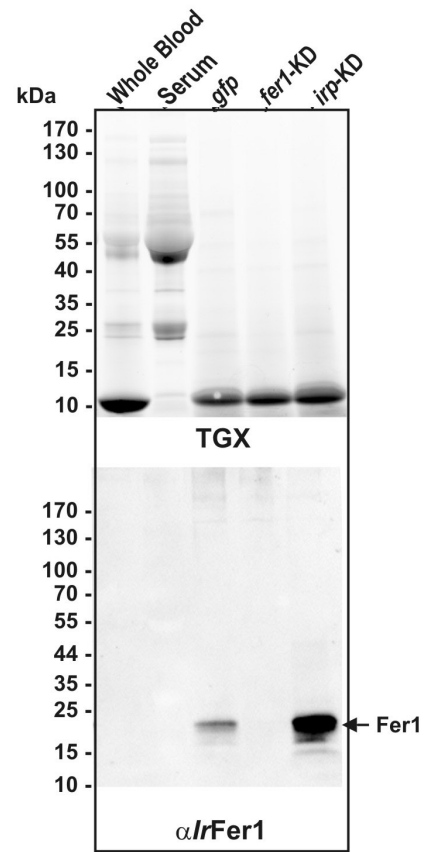

C

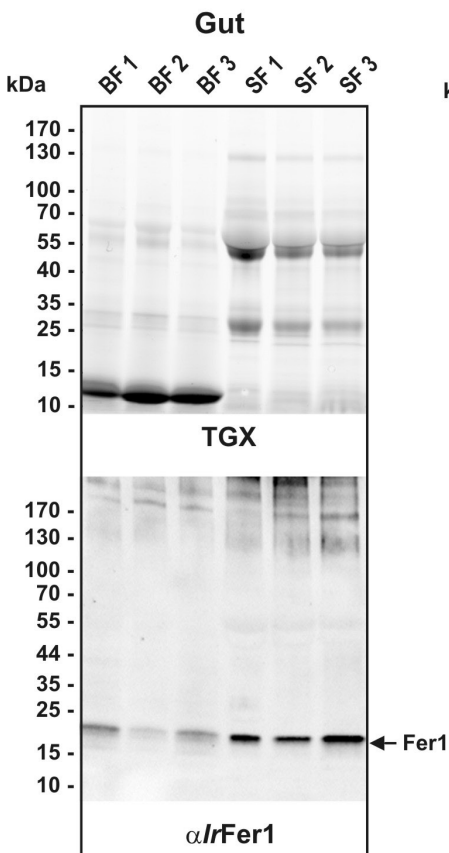

D

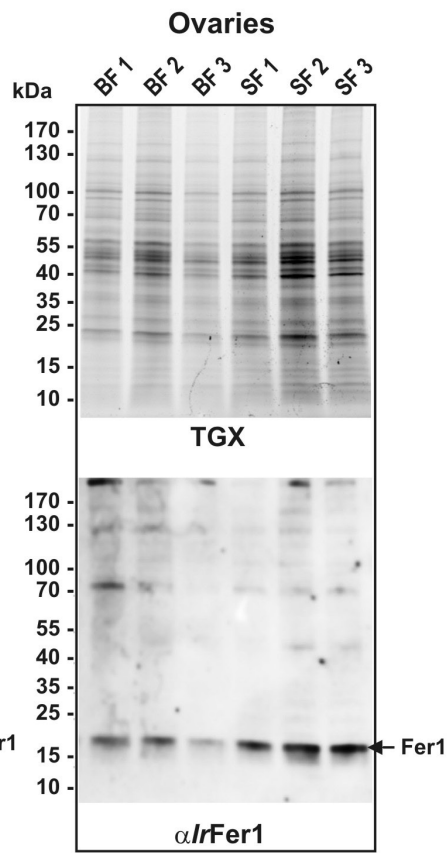

E

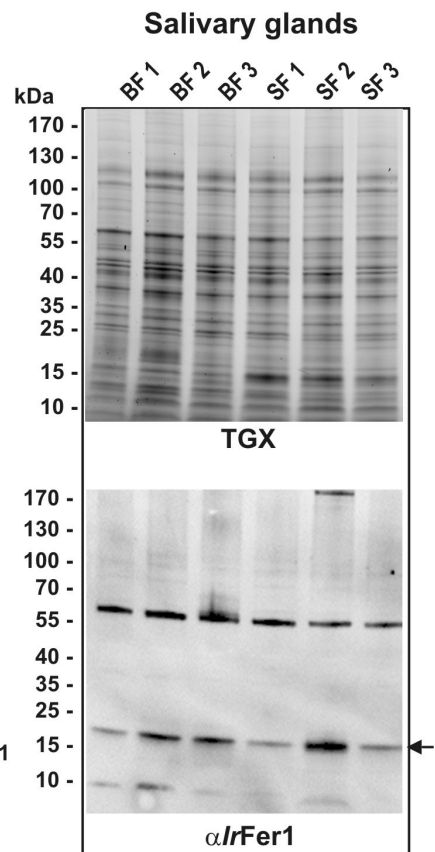

Supplement: supp [file elife-12318-supp-v1.zip]
